# Supplementary material for: Reviewing the WHO Tube Bioassay Methodology: Accurate Methods Reporting and Number of Mosquitoes Key to Producing Robust Results
Source: Preprints.org preprint supplement (doi:10.20944/preprints202203.0350.v1), 2022-03-25
Supplement: Supplementary file 1 [file supplementary]

## Sheet: Rep 1 - WHO Tube - Kisumu
Assay:	WHO tube	Mosquito species:	Anopheles gambiae	Date:	2021-07-29
Papers coated on:	2021-07-28	Mosquito strain:	Kisumu	Time on:	09:30:00
Papers coated at:	PM	Insecticide:	Permethrin	Time off:	10:30:00
Mosquito age:	2-5 days	Replicate:	1	24 hrs rec at:	13:00:00
Insecticide details (%)	60 mins kd/dead	24 hrs kd/dead	Total No.	% kd 1 hrs	% mortality 24 hrs		Insecticide details (%)	60 mins kd/dead	24 hrs kd/dead	Total No.	% kd 1 hrs	% mortality 24 hrs	STDEV 1 hrs	STDEV 24 hrs	STERR 1 hrs	STERR 24 hrs
Negative	0	1	26	0	3.84615		Negative	0	3	50	0	6	0	2.24359	0	1.58646
Negative	0	2	24	0	8.33333		Covered	28	23	53	52.8302	43.3962	6.55271	1.06838	4.63346	0.755456
Covered	12	11	26	46.1538	42.3077		Uncovered	27	18	51	52.9412	35.2941	3	0.692308	2.12132	0.489535
Covered	16	12	27	59.2593	44.4444		30 per tube	22	14	61	36.0656	22.9508	0.591398	3.65591	0.418181	2.58512
Uncovered	13	9	26	50	34.6154		20 per tube	10	5	39	25.641	12.8205	0.657895	7.36842	0.465202	5.21026
Uncovered	14	9	25	56	36		15 per tube	4	1	32	12.5	3.125	6.25	3.125	4.41942	2.20971
30 per tube	11	8	30	36.6667	26.6667		10 per tube	2	0	20	10	0	0	0	0	0
30 per tube	11	6	31	35.4839	19.3548
20 per tube	5	4	20	25	20
20 per tube	5	1	19	26.3158	5.26316
15 per tube	1	0	16	6.25	0
15 per tube	3	1	16	18.75	6.25
10 per tube	1	0	10	10	0
10 per tube	1	0	10	10	0
-ve control batch number: PY370
Permethrin exposure is 0.043%

## Sheet: Rep 2 - WHO Tube - Kisumu
Assay:	WHO tube	Mosquito species:	Anopheles gambiae	Date:	2021-08-03
Papers coated on:	2021-07-28	Mosquito strain:	Kisumu	Time on:	15:00:00
Papers coated at:	PM	Insecticide:	Permethrin	Time off:	16:00:00
Mosquito age:	2-5 days	Replicate:	2	24 hrs rec at:	15:00:00
Insecticide details (%)	60 mins kd/dead	24 hrs kd/dead	Total No.	% kd 1 hrs	% mortality 24 hrs		Insecticide details (%)	60 mins kd/dead	24 hrs kd/dead	Total No.	% kd 1 hrs	% mortality 24 hrs	STDEV 1 hrs	STDEV 24 hrs	STERR 1 hrs	STERR 24 hrs
Negative	0	0	23	0	0		Negative	0	2	47	0	4.25532	0	4.16667	0	2.94628
Negative	0	2	24	0	8.33333		Covered	14	25	50	28	50	5.12821	8.01282	3.62619	5.66592
Covered	8	10	24	33.3333	41.6667		Uncovered	15	31	54	27.7778	57.4074	2.88462	11.4011	2.03973	8.06179
Covered	6	15	26	23.0769	57.6923		30 per tube	20	44	63	31.746	69.8413	2.67137	16.9859	1.88894	12.0108
Uncovered	8	18	26	30.7692	69.2308		20 per tube	8	22	40	20	55	6.01504	7.26817	4.25327	5.13937
Uncovered	7	13	28	25	46.4286		15 per tube	5	21	32	15.625	65.625	14.7059	17.8431	10.3986	12.617
30 per tube	9	27	31	29.0323	87.0968		10 per tube	1	1	20	5	5	5	5	3.53553	3.53553
30 per tube	11	17	32	34.375	53.125
20 per tube	3	13	21	14.2857	61.9048
20 per tube	5	9	19	26.3158	47.3684
15 per tube	5	14	17	29.4118	82.3529
15 per tube	0	7	15	0	46.6667
10 per tube	0	0	10	0	0
10 per tube	1	1	10	10	10
-ve control batch number: PY370
Permethrin exposure is 0.043%

## Sheet: Rep 3 - WHO Tube - Kisumu
Assay:	WHO tube	Mosquito species:	Anopheles gambiae	Date:	2021-08-05
Papers coated on:	2021-07-28	Mosquito strain:	Kisumu	Time on:	15:00:00
Papers coated at:	PM	Insecticide:	Permethrin	Time off:	16:00:00
Mosquito age:	2-5 days	Replicate:	3	24 hrs rec at:	15:00:00
Insecticide details (%)	60 mins kd/dead	24 hrs kd/dead	Total No.	% kd 1 hrs	% mortality 24 hrs		Insecticide details (%)	60 mins kd/dead	24 hrs kd/dead	Total No.	% kd 1 hrs	% mortality 24 hrs	STDEV 1 hrs	STDEV 24 hrs	STERR 1 hrs	STERR 24 hrs
Negative	0	1	25	0	4		Negative	1	3	49	2.04082	6.12245	2.08333	2.16667	1.47314	1.53206
Negative	1	2	24	4.16667	8.33333		Covered	17	28	51	33.3333	54.902	5.23077	6.76923	3.69871	4.78657
Covered	7	12	25	28	48		Uncovered	15	34	51	29.4118	66.6667	1.38462	13.0769	0.979071	9.24678
Covered	10	16	26	38.4615	61.5385		30 per tube	21	43	59	35.5932	72.8814	1.09195	10.6322	0.772128	7.51809
Uncovered	7	20	25	28	80		20 per tube	8	22	40	20	55	0	5	0	3.53553
Uncovered	8	14	26	30.7692	53.8462		15 per tube	5	21	30	16.6667	70	2.23214	12.0536	1.57836	8.52316
30 per tube	11	25	30	36.6667	83.3333		10 per tube	2	3	21	9.52381	14.2857	0.454545	4.09091	0.321412	2.89271
30 per tube	10	18	29	34.4828	62.069
20 per tube	4	12	20	20	60
20 per tube	4	10	20	20	50
15 per tube	3	13	16	18.75	81.25
15 per tube	2	8	14	14.2857	57.1429
10 per tube	1	2	11	9.09091	18.1818
10 per tube	1	1	10	10	10
-ve control batch number: PY370
Permethrin exposure is 0.043%

## Sheet: Rep 4 - WHO Tube - Kisumu
Assay:	WHO tube	Mosquito species:	Anopheles gambiae	Date:	2021-08-11
Papers coated on:	2021-07-28	Mosquito strain:	Kisumu	Time on:	15:30:00
Papers coated at:	PM	Insecticide:	Permethrin	Time off:	16:30:00
Mosquito age:	2-5 days	Replicate:	4	24 hrs rec at:	15:00:00
Insecticide details (%)	60 mins kd/dead	24 hrs kd/dead	Total No.	% kd 1 hrs	% mortality 24 hrs		Insecticide details (%)	60 mins kd/dead	24 hrs kd/dead	Total No.	% kd 1 hrs	% mortality 24 hrs	STDEV 1 hrs	STDEV 24 hrs	STERR 1 hrs	STERR 24 hrs
Negative	1	2	26	3.84615	7.69231		Negative	1	3	51	1.96078	5.88235	1.92308	1.84615	1.35982	1.30543
Negative	0	1	25	0	4		Covered	10	12	26	38.4615	46.1538	0	0	0	0
Covered	10	12	26	38.4615	46.1538		Uncovered	8	14	25	32	56	0	0	0	0
Uncovered	8	14	25	32	56		20 per tube	8	25	58	13.7931	43.1034	2.31752	8.13475	1.33802	4.6966
20 per tube	3	10	20	15	50		15 per tube	14	42	76	18.4211	55.2632	5.17472	7.18022	2.31421	3.21109
20 per tube	2	9	19	10.5263	47.3684		10 per tube	11	20	102	10.7843	19.6078	6.74766	7.99478	2.1338	2.52817
20 per tube	3	6	19	15.7895	31.5789
15 per tube	3	10	15	20	66.6667
15 per tube	2	8	16	12.5	50
15 per tube	4	9	15	26.6667	60
15 per tube	3	7	15	20	46.6667
15 per tube	2	8	15	13.3333	53.3333
10 per tube	1	2	10	10	20
10 per tube	1	1	9	11.1111	11.1111
10 per tube	2	3	11	18.1818	27.2727
10 per tube	0	2	10	0	20
10 per tube	2	2	12	16.6667	16.6667
10 per tube	1	1	10	10	10
10 per tube	1	2	10	10	20
10 per tube	2	3	9	22.2222	33.3333
10 per tube	1	3	10	10	30
10 per tube	0	1	11	0	9.09091
-ve control batch number: PY370
Permethrin exposure is 0.043%

## Sheet: Rep 1 - WHO Tube - VK7
Assay:	WHO tube	Mosquito species:	Anopheles coluzzii	Date:	2021-08-11
Papers coated on:	January/February 2021	Mosquito strain:	VK7	Time on:	15:30:00
Paper batch number:	PE668/PE663	Insecticide:	Permethrin	Time off:	16:30:00
Mosquito age:	2-5 days	Replicate:	1	24 hrs rec at:	15:00:00
Insecticide details (%)	60 mins kd/dead	24 hrs kd/dead	Total No.	% kd 1 hrs	% mortality 24 hrs		Insecticide details (%)	60 mins kd/dead	24 hrs kd/dead	Total No.	% kd 1 hrs	% mortality 24 hrs	STDEV 1 hrs	STDEV 24 hrs	STERR 1 hrs	STERR 24 hrs
Negative	0	1	24	0	4.16667		Negative	0	1	50	0	2	0	2.08333	0	1.47314
Negative	0	0	26	0	0		Covered	0	2	47	0	4.25532	0	3.57143	0	2.52538
Covered	0	2	28	0	7.14286		Uncovered	0	4	48	0	8.33333	0	4.52174	0	3.19735
Covered	0	0	19	0	0		30 per tube	0	1	60	0	1.66667	0	1.72414	0	1.21915
Uncovered	0	3	23	0	13.0435		20 per tube	0	2	39	0	5.12821	0	0.131579	0	0.0930404
Uncovered	0	1	25	0	4		15 per tube	0	0	30	0	0	0	0	0	0
30 per tube	0	0	31	0	0		10 per tube	0	1	20	0	5	0	5	0	3.53553
30 per tube	0	1	29	0	3.44828
20 per tube	0	1	20	0	5
20 per tube	0	1	19	0	5.26316
15 per tube	0	0	15	0	0
15 per tube	0	0	15	0	0
10 per tube	0	1	10	0	10
10 per tube	0	0	10	0	0
-ve control batch number: PY370

## Sheet: Rep 2 - WHO Tube - VK7
Assay:	WHO tube	Mosquito species:	Anopheles coluzzii	Date:
Papers coated on:	January/February 2021	Mosquito strain:	VK7	Time on:
Paper batch number:	PE668/PE663	Insecticide:	Permethrin	Time off:
Mosquito age:	2-5 days	Replicate:	1	24 hrs rec at:
Insecticide details (%)	60 mins kd/dead	24 hrs kd/dead	Total No.	% kd 1 hrs	% mortality 24 hrs		Insecticide details (%)	60 mins kd/dead	24 hrs kd/dead	Total No.	% kd 1 hrs	% mortality 24 hrs	STDEV 1 hrs	STDEV 24 hrs	STERR 1 hrs	STERR 24 hrs
Negative	0	1	24	0	4.16667		Negative	0	2	49	0	4.08163	0	0.0833333	0	0.0589256
Negative	0	1	25	0	4		Covered	0	5	51	0	9.80392	0	1.76923	0	1.25104
Covered	0	3	26	0	11.5385		Uncovered	0	4	49	0	8.16327	0	4.25	0	3.0052
Covered	0	2	25	0	8		30 per tube	1	2	60	1.66667	3.33333	1.66667	3.33333	1.17851	2.35702
Uncovered	0	3	24	0	12.5		20 per tube	0	1	39	0	2.5641	0	2.77778	0	1.96419
Uncovered	0	1	25	0	4		15 per tube	0	1	32	0	3.125	0	3.125	0	2.20971
30 per tube	1	2	30	3.33333	6.66667		10 per tube	0	0	21	0	0	0	0	0	0
30 per tube	0	0	30	0	0
20 per tube	0	1	18	0	5.55556
20 per tube	0	0	21	0	0
15 per tube	0	0	16	0	0
15 per tube	0	1	16	0	6.25
10 per tube	0	0	11	0	0
10 per tube	0	0	10	0	0
-ve control batch number: PY370

## Sheet: Rep 1 - WHO Tube - Tiassale
Assay:	WHO tube	Mosquito species:	Anopheles gambiae	Date:	2021-09-10
Papers coated on:	January/February 2021	Mosquito strain:	Tiassale	Time on:	15:25:00
Paper batch number:	PE668/PE663	Insecticide:	Permethrin	Time off:	16:25:00
Mosquito age:	5 days	Replicate:	1	24 hrs rec at:	17:35:00
Insecticide details (%)	60 mins kd/dead	24 hrs kd/dead	Total No.	% kd 1 hrs	% mortality 24 hrs		Insecticide details (%)	60 mins kd/dead	24 hrs kd/dead	Total No.	% kd 1 hrs	% mortality 24 hrs	STDEV 1 hrs	STDEV 24 hrs	STERR 1 hrs	STERR 24 hrs
Negative	0	0	27	0	0		Negative	0	1	56	0	1.78571	0	1.72414	0	1.21915
Negative	0	1	29	0	3.44828		Covered	2	3	54	3.7037	5.55556	0	1.85185	0	1.30946
Covered	1	1	27	3.7037	3.7037		Uncovered	3	9	53	5.66038	16.9811	1.78063	1.56695	1.25909	1.108
Covered	1	2	27	3.7037	7.40741		30 per tube	1	7	64	1.5625	10.9375	1.51515	1.90616	1.07137	1.34786
Uncovered	2	5	27	7.40741	18.5185		20 per tube	0	5	41	0	12.1951	0	2.14286	0	1.51523
Uncovered	1	4	26	3.84615	15.3846		15 per tube	2	5	30	6.66667	16.6667	6.66667	16.6667	4.71405	11.7851
30 per tube	1	3	33	3.0303	9.09091		10 per tube	0	3	22	0	13.6364	0	5.83333	0	4.12479
30 per tube	0	4	31	0	12.9032
20 per tube	0	3	21	0	14.2857
20 per tube	0	2	20	0	10
15 per tube	2	5	15	13.3333	33.3333
15 per tube	0	0	15	0	0
10 per tube	0	1	12	0	8.33333
10 per tube	0	2	10	0	20
-ve control batch number: PY370

## Sheet: Rep 2 - WHO Tube - Tiassale
Assay:	WHO tube	Mosquito species:	Anopheles gambiae	Date:	2021-09-14
Papers coated on:	January/February 2021	Mosquito strain:	Tiassale	Time on:	15:30:00
Paper batch number:	PE668/PE663	Insecticide:	Permethrin	Time off:	16:30:00
Mosquito age:	5 days	Replicate:	2	24 hrs rec at:	15:00:00
Insecticide details (%)	60 mins kd/dead	24 hrs kd/dead	Total No.	% kd 1 hrs	% mortality 24 hrs		Insecticide details (%)	60 mins kd/dead	24 hrs kd/dead	Total No.	% kd 1 hrs	% mortality 24 hrs	STDEV 1 hrs	STDEV 24 hrs	STERR 1 hrs	STERR 24 hrs
Negative	0	0	24	0	0		Negative	0	1	49	0	2.04082	0	2	0	1.41421
Negative	0	1	25	0	4		Covered	6	6	50	12	12	3.52564	0.480769	2.493	0.339955
Covered	2	3	24	8.33333	12.5		Uncovered	5	8	52	9.61538	15.3846	1.55556	4.44444	1.09994	3.1427
Covered	4	3	26	15.3846	11.5385		30 per tube	10	10	63	15.873	15.873	0.252016	0.252016	0.178202	0.178202
Uncovered	2	5	25	8	20		20 per tube	5	6	39	12.8205	15.3846	2.23684	0.394737	1.58169	0.279121
Uncovered	3	3	27	11.1111	11.1111		15 per tube	4	5	29	13.7931	17.2414	7.38095	17.8571	5.21912	12.6269
30 per tube	5	5	31	16.129	16.129		10 per tube	1	3	20	5	15	5	5	3.53553	3.53553
30 per tube	5	5	32	15.625	15.625
20 per tube	2	3	19	10.5263	15.7895
20 per tube	3	3	20	15	15
15 per tube	3	5	14	21.4286	35.7143
15 per tube	1	0	15	6.66667	0
10 per tube	0	1	10	0	10
10 per tube	1	2	10	10	20
-ve control batch number: PY370

## Sheet: Rep 3 - WHO Tube - Tiassale 
Assay:	WHO tube	Mosquito species:	Anopheles gambiae	Date:	2021-09-16
Papers coated on:	January/February 2021	Mosquito strain:	Tiassale	Time on:	15:00:00
Paper batch number:	PE668/PE663	Insecticide:	Permethrin	Time off:	16:00:00
Mosquito age:	5 days	Replicate:	3	24 hrs rec at:	12:30:00
Insecticide details (%)	60 mins kd/dead	24 hrs kd/dead	Total No.	% kd 1 hrs	% mortality 24 hrs		Insecticide details (%)	60 mins kd/dead	24 hrs kd/dead	Total No.	% kd 1 hrs	% mortality 24 hrs	STDEV 1 hrs	STDEV 24 hrs	STERR 1 hrs	STERR 24 hrs
Negative	0	0	28	0	0		Negative	0	1	53	0	1.88679	0	2	0	1.41421
Negative	0	1	25	0	4		Covered	9	7	52	17.3077	13.4615	5.76923	1.92308	4.07946	1.35982
Covered	3	4	26	11.5385	15.3846		Uncovered	7	5	54	12.963	9.25926	5.55556	5.55556	3.92837	3.92837
Covered	6	3	26	23.0769	11.5385		30 per tube	17	13	66	25.7576	19.697	1.51515	1.51515	1.07137	1.07137
Uncovered	2	4	27	7.40741	14.8148		20 per tube	10	6	41	24.3902	14.6341	5.47619	5.2381	3.87225	3.70389
Uncovered	5	1	27	18.5185	3.7037		15 per tube	5	5	28	17.8571	17.8571	10.7143	17.8571	7.57614	12.6269
30 per tube	8	7	33	24.2424	21.2121		10 per tube	1	1	20	5	5	5	5	3.53553	3.53553
30 per tube	9	6	33	27.2727	18.1818
20 per tube	4	2	21	19.0476	9.52381
20 per tube	6	4	20	30	20
15 per tube	4	5	14	28.5714	35.7143
15 per tube	1	0	14	7.14286	0
10 per tube	0	0	10	0	0
10 per tube	1	1	10	10	10
-ve control batch number: PY370

## Sheet: Rep 1 - WHO Tube - Tiassale AGE
Assay:	WHO tube	Mosquito species:	Anopheles gambiae	Date:	2021-09-23
Papers coated on:	January/February 2021	Mosquito strain:	Tiassale	Time on:	13:40:00
Paper batch number:	PE668/PE663	Insecticide:	Permethrin	Time off:	14:40:00
Mosquito age:	5 days	Replicate:	1	24 hrs rec at:	15:00:00
Insecticide details (%)	60 mins kd/dead	24 hrs kd/dead	Total No.	% kd 1 hrs	% mortality 24 hrs		Insecticide details (%)	60 mins kd/dead	24 hrs kd/dead	Total No.	% kd 1 hrs	% mortality 24 hrs	STDEV 1 hrs	STDEV 24 hrs	STERR 1 hrs	STERR 24 hrs
Negative 1	0	0	27	0	0		Negative	0	1	56	0	1.78571	0	1.72414	0	1.21915
Negative 2	0	1	29	0	3.44828		Permethrin	7	10	102	6.86275	9.80392	3.32531	4.2658	1.66265	2.1329
Permethrin 1	1	1	23	4.34783	4.34783
Permethrin 2	3	3	25	12	12
Permethrin 3	1	2	28	3.57143	7.14286
Permethrin 4	2	4	26	7.69231	15.3846
-ve control batch number: PY370

[truncated: 19 more sheets: Rep 2 - WHO Tube - Tiassale AGE, Rep 3 - WHO Tube - Tiassale AGE, Rep 1 - WHO Tube - Kisumu AGE, Rep 2 - WHO Tube - Kisumu AGE, Rep 3 - WHO Tube - Kisumu AGE, Rep 4 - WHO Tube - Tiassale, Rep 5 - WHO Tube - Kisumu, Rep 4 - WHO Tube - Tiassale Age, Rep 5 - WHO Tube - Tiassale Age, Rep 6 - WHO Tube - Tiassale Age, Rep 4 - WHO Tube - Kisumu Age, Rep 5 - WHO Tube - Kisumu Age, Rep 6 - WHO Tube - Kisumu Age, Rep 7 - WHO Tube - Tiassale Age, Rep 8 - WHO Tube - Tiassale Age, Rep 9 - WHO Tube - Tiassale Age, Rep 7 - WHO Tube - Kisumu Age, Rep 8 - WHO Tube - Kisumu Age, Rep 9 - WHO Tube - Kisumu Age]
